# Supplementary material for: CD16/PD-L1 bi-specific aptamer for cancer immunotherapy through recruiting NK cells and acting as immunocheckpoint blockade
Source: PubMed Central journal article supplement (PMC8844804; doi:10.1016/j.omtn.2022.01.010), 2022-01-19
Supplement: mmc1.pdf [file mmc1.pdf]

OMTN, Volume 27

## **Supplemental information**

### **CD16/PD-L1 bi-specific aptamer for cancer immunotherapy through recruiting NK cells and acting as immuncheckpoint blockade**

**Aixian Zheng, Yanlin Du, Yiru Wang, Youshi Zheng, Zhaoyu Ning, Ming Wu, Cuilin Zhang, Da Zhang, Jingfeng Liu, and Xiaolong Liu**

**Table S1. The sequences of aptamers used in this study**

| Name         | Detailed sequence                                                                                                                               |
|--------------|-------------------------------------------------------------------------------------------------------------------------------------------------|
| CD16-apt     | 5'-(P)-GACCTG <u>CCCACTGCGGGGGTCTATACGTGAGGA</u><br><u>AGAAGTGGGCAGGTCCAGACGGGCTTTTTTTTTTTTTTT</u><br>TTTTTTTTTTTTTTTTTTTTT <u>GCCCGTCTG-3'</u> |
| PD-L1-apt    | 5'-(P)-GACCTG <u>CCCACTTTTTTTTTTTTTTTTTTTTTTTTTTT</u><br><u>AGTGGGCAGGTCCAGACGGGCCACATCAACTCATTGAT</u><br><u>AGACAATGCGTCCACTGCCCGTCTG-3'</u>   |
| CPmut-bi-apt | 5'-(P)-GACCTG <u>CCCACTGCGGGGGTCTATACGTGAGGA</u><br><u>AGAAGTGGGCAGGTCCAGACGGGCCACATCAACTCAT</u><br><u>TCATACACAATCCCTCCACTGCCCGTCTG-3'</u>     |
| CmutP-bi-apt | 5'-(P)-GACCTG <u>CCCACTCCGGCGGTGTATACCTGAGCAA</u><br><u>GAAGTGGGCAGGTCCAGACGGGCCACATCAACTCATT</u><br><u>GATAGACAATGCGTCCACTGCCCGTCTG-3'</u>     |
| CP-bi-apt    | 5'-(P)-GACCTG <u>CCCACTGCGGGGGTCTATACGTGAGGA</u><br><u>AGAAGTGGGCAGGTCCAGACGGGCCACATCAACTCAT</u><br><u>TGATAGACAATGCGTCCACTGCCCGTCTG-3'</u>     |

The letters with straight underline and wavy underline represent the sequences of CD16 aptamer and PD-L1 aptamer, respectively. CD16-apt and PD-L1-apt were constructed by only replacing the bases of counter aptamer in the loop of the CP-bi-apt with T bases. CmutP-bi-apt and CP<sub>mut</sub>-bi-apt are the aptamers with some mutations, which were marked in bold italics. All of them are used as control.

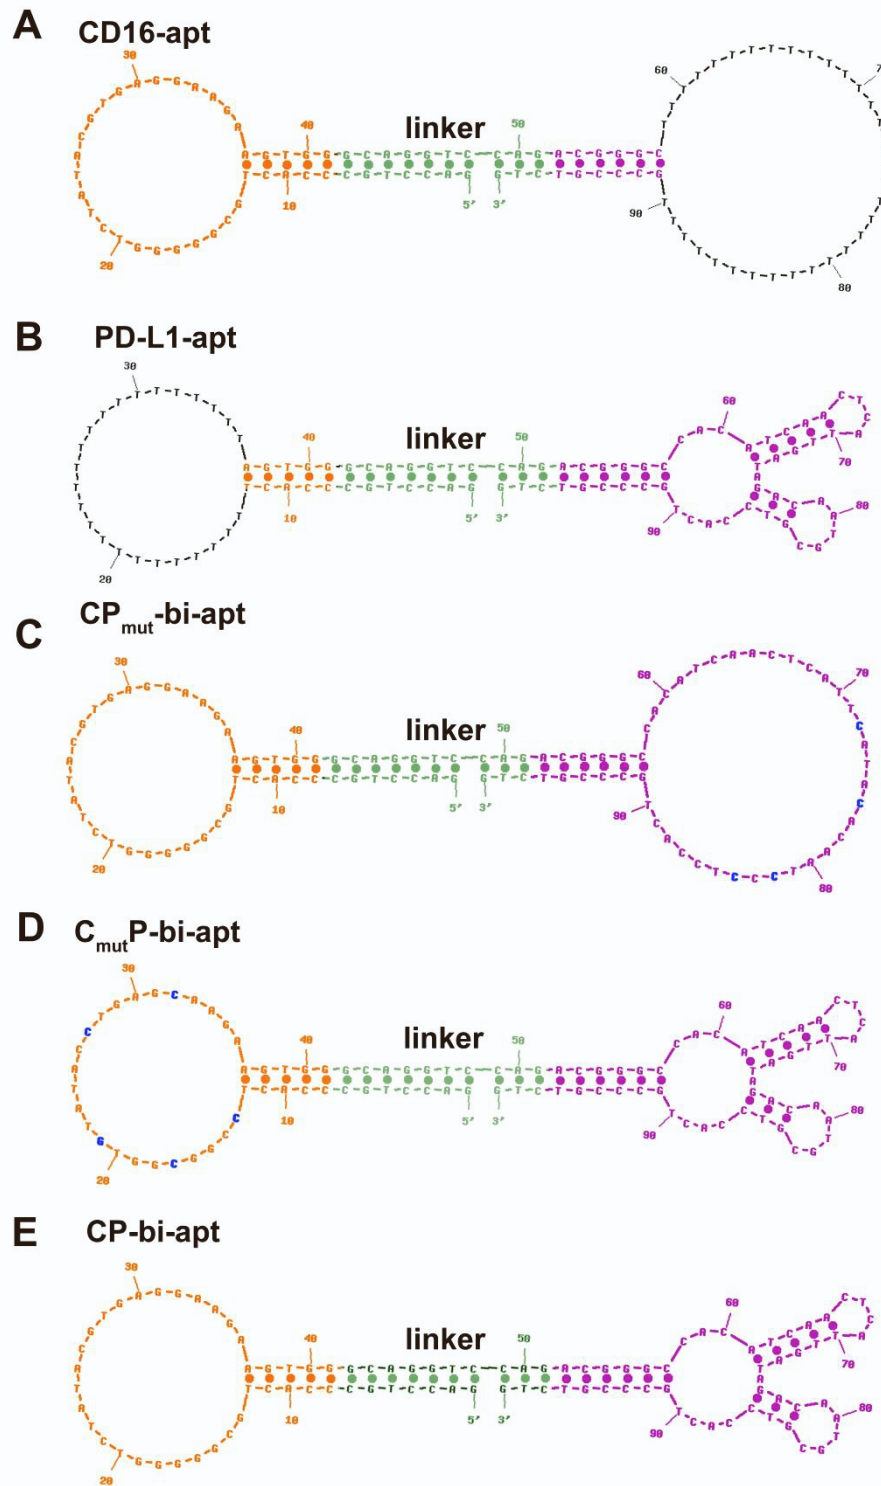

**Figure S1.** The predicted structures of the aptamers used in this study. The letters in green represent the sequences of linker.

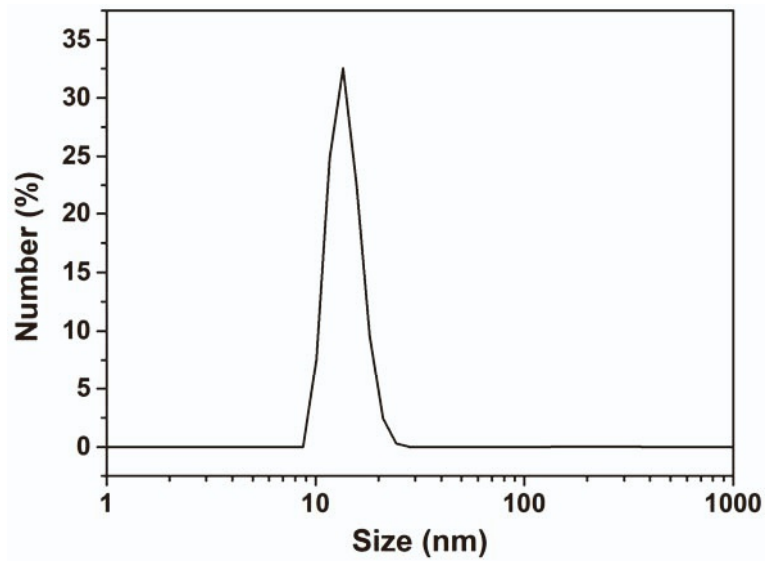

**Figure S2.** The hydrodynamic size of CP-bi-apt measured by Dynamic Light Scattering (DLS).

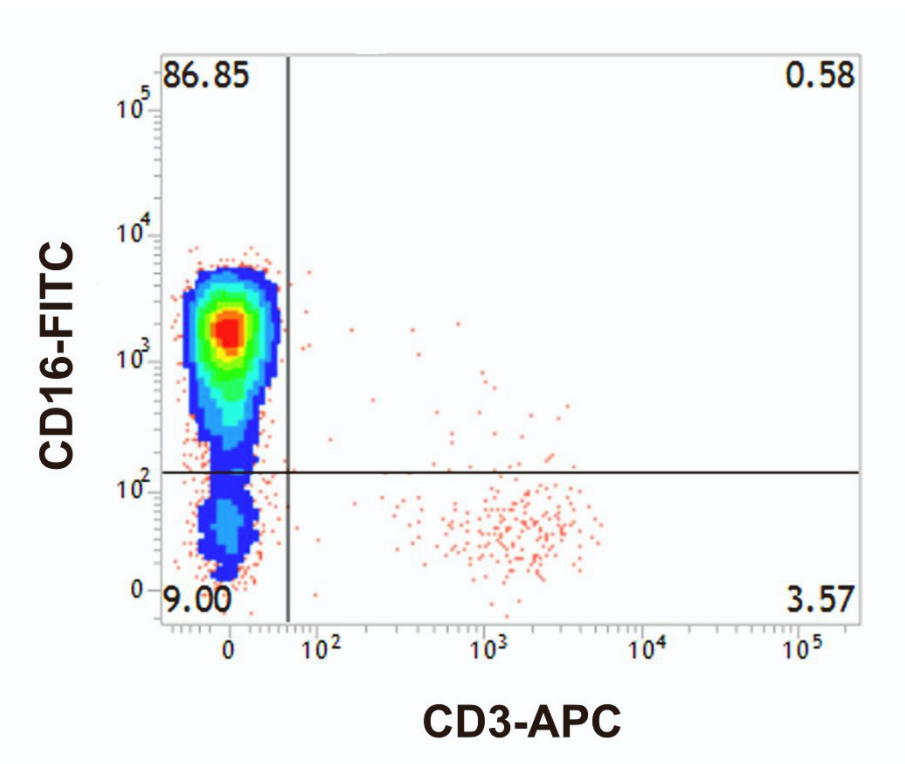

**Figure S3.** The expression of CD16 in human NK cells. NK cells were stained with anti-CD3-APC and anti-CD16-FITC before determining by flow cytometry.

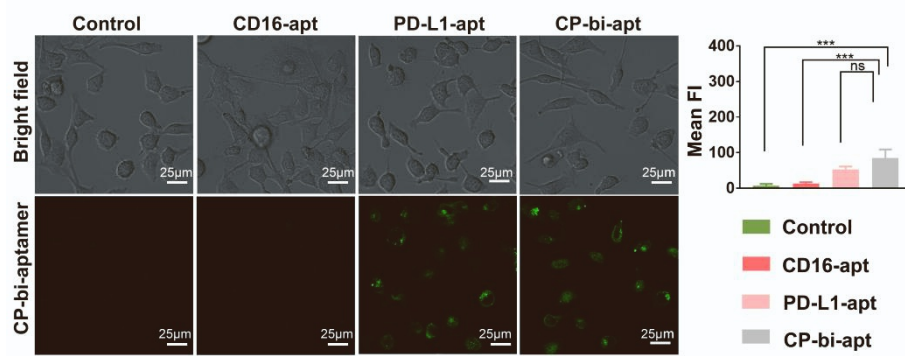

**Figure S4.** The binding ability of CP-bi-apt to QSG-7701 cells. QSG-7701 cells were incubated with 200 nM Evagreen-labeled different aptamers (CD16-apt, PD-L1-apt and CP-bi-apt) for 30 min. The fluorescence images were detected by confocal microscope (488 nm).

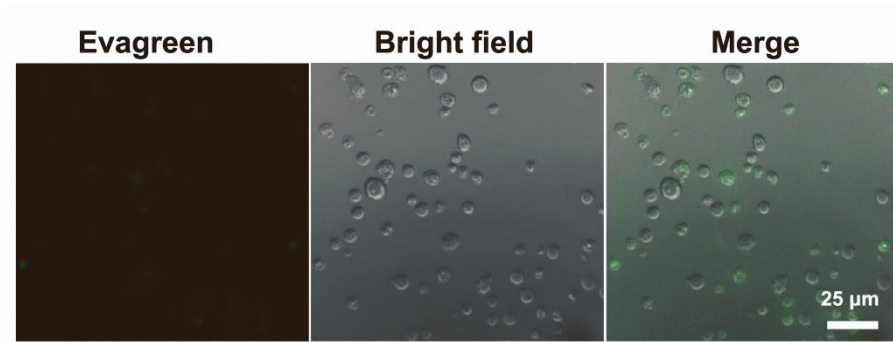

**Figure S5.** Confocal fluorescence images of murine NK cells incubated with Evagreen labeled CP-bi-apt (200 nM).

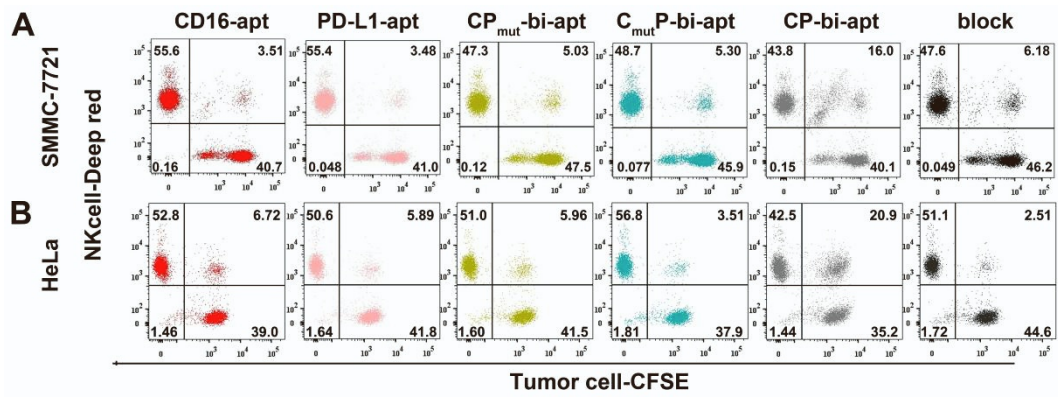

**Figure S6.** Flow cytometric analysis of CFSE-labeled (A) SMMC-7721 cells or (B) HeLa cells after co-incubating with Cell-Tracker Deep Red-labeled NK cells at 37°C for 60 min. NK cells were pretreated with different aptamers (PD-L1-apt, CD16-apt, C<sub>mut</sub>P-bi-apt, CP<sub>mut</sub>-bi-apt or CP-bi-apt) at 37°C for 30 min.



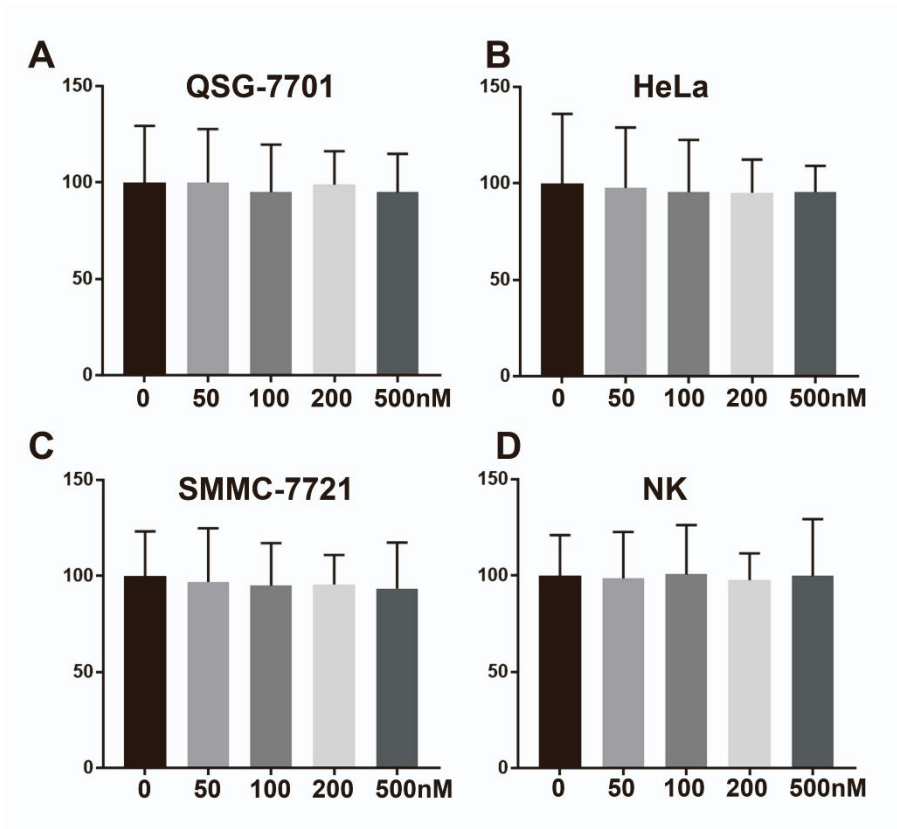

**Figure S7.** The in vitro toxicity of CP-bi-apt in different cells analyzed by CCK8 assay. Cell viability of (A) QSG-7701, (B) HeLa, (C) SMMC-7721 and (D) NK cells after co-incubation with different concentrations of CP-bi-apt (0, 50, 100, 200, 500 nM) for 24 h.

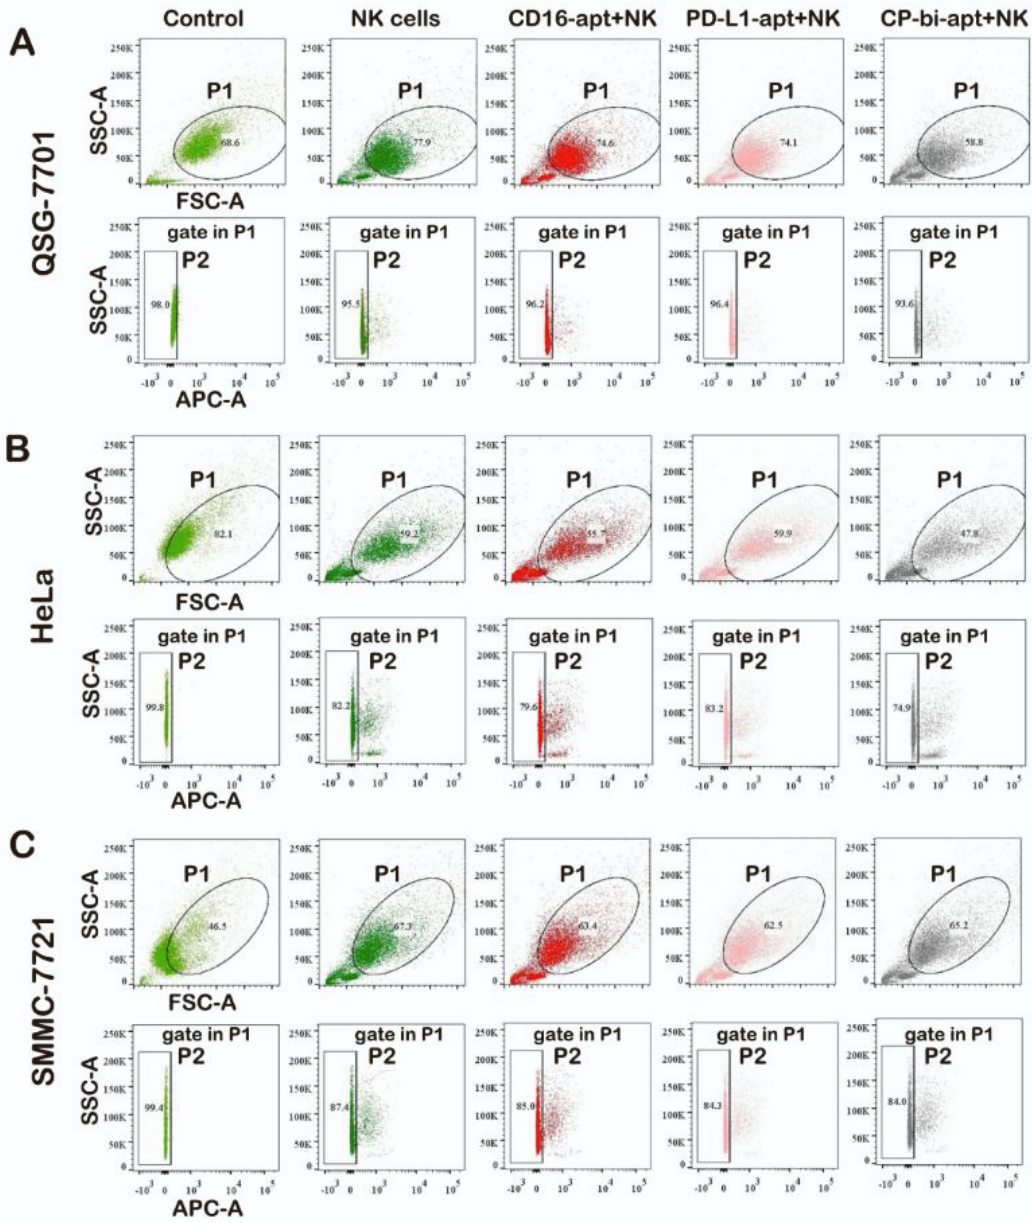

**Figure S8.** The gating strategy for flow cytometry analysis of (A) QSG-7701, (B) HeLa and (C) SMMC-7721 cells in the presence of NK cells and different aptamers (PD-L1-apt, CD16-apt or CP-bi-apt).

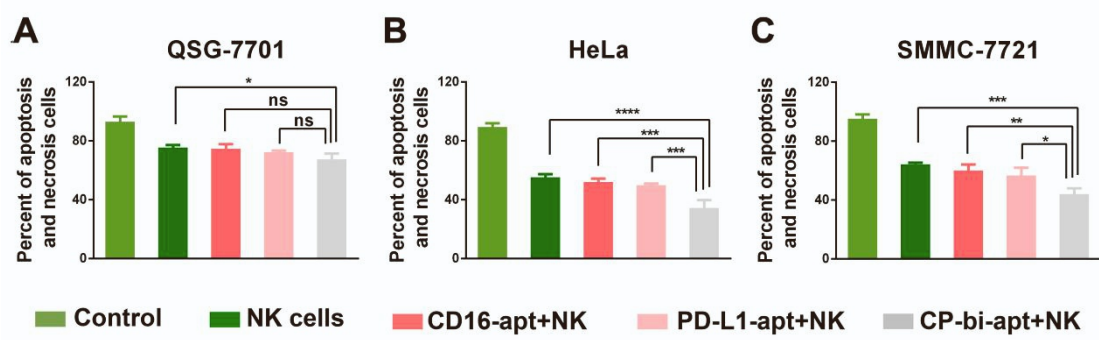

**Figure S9.** Flow cytometry analysis for evaluating the killing effect. Percentage of apoptosis and necrosis of (A) QSG-7701, (B) HeLa and (C) SMMC-7721 cells after incubation with NK cells and different aptamers. The data represents the average result of three independent experiments.

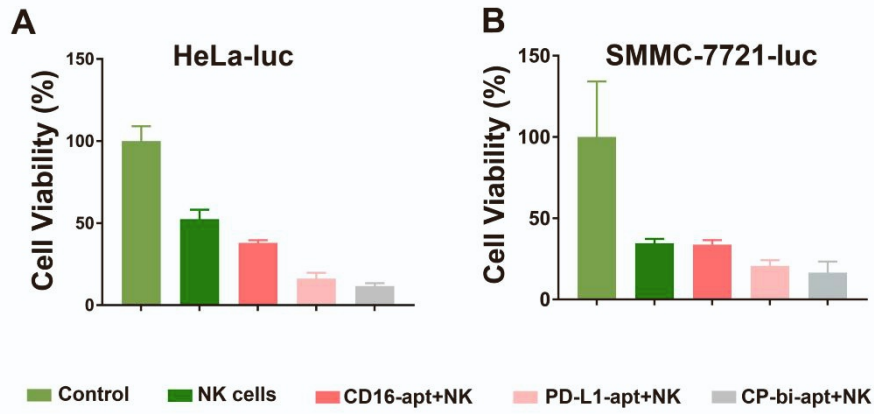

**Figure S10.** The luciferase based lysis assay for evaluating the killing effect. Cell viability of (A) HeLa-luc and (B) SMMC-7721-luc after co-incubation with NK cells and different kinds of aptamers (PD-L1-apt, CD16-apt or CP-bi-apt) for 3h.

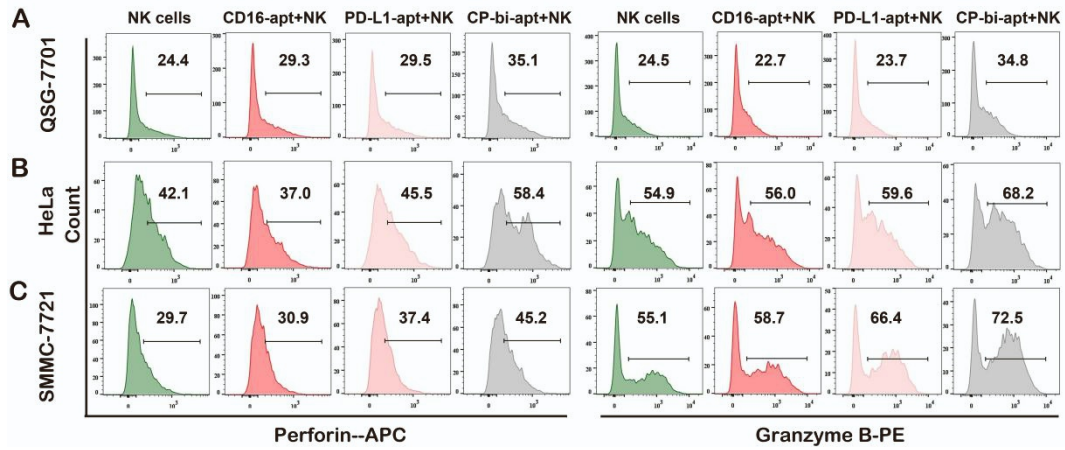

**Figure S11.** Flow cytometric analysis of intracellular Granzyme B and perforin of NK cells after co-incubating with different aptamers and (D) QSG-7701, (E) HeLa or (F) SMMC-7721 cells. The above experiments are all gated on CD56(+) cells by using FITC-conjugated anti-CD56 antibody.

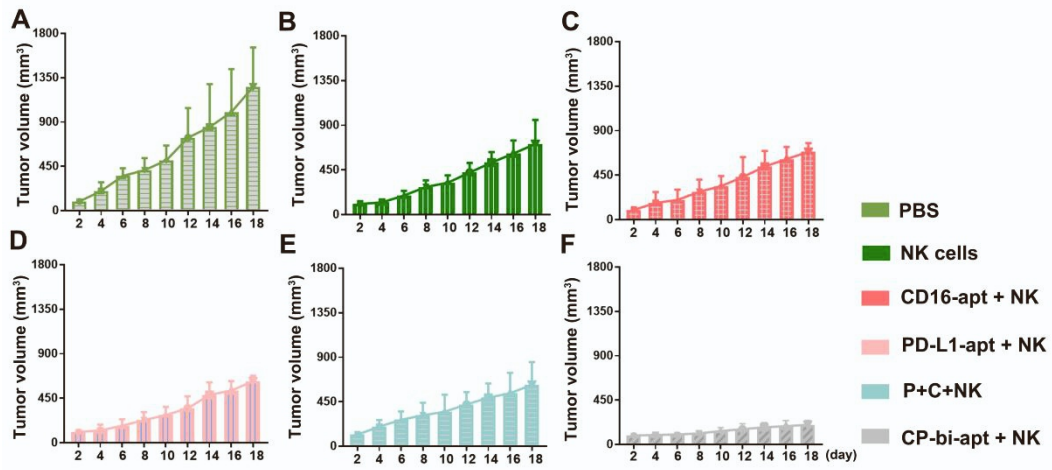

**Figure S12.** The individual growth curves of the tumors after various treatments (PBS, free NK cells, CD16-apt + NK cells, PD-L1-apt + NK cells, CD16-apt + PD-L1-apt +NK cells, CP-bi-apt + NK cells, n=5).

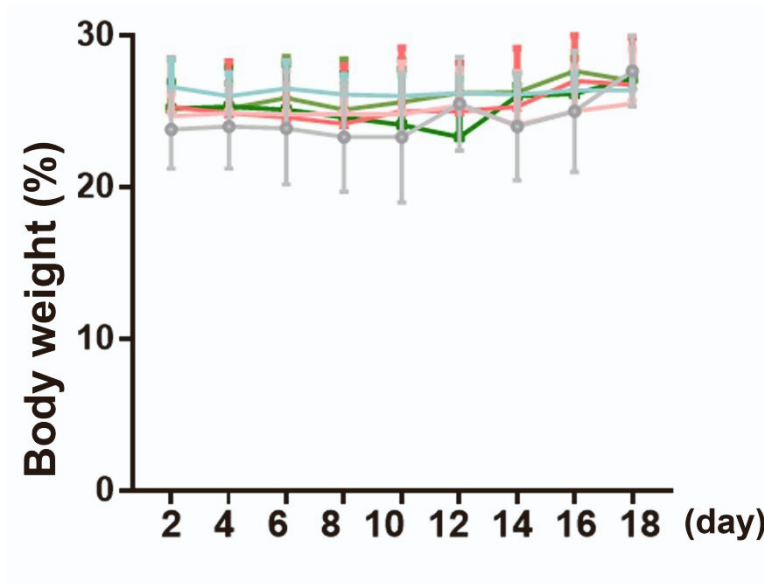

**Figure S13.** The body weights of the mice after various treatments (PBS, free NK cells, CD16-apt + NK cells, PD-L1-apt + NK cells, CD16-apt + PD-L1-apt +NK cells, CP-bi-apt + NK cells, n=5).

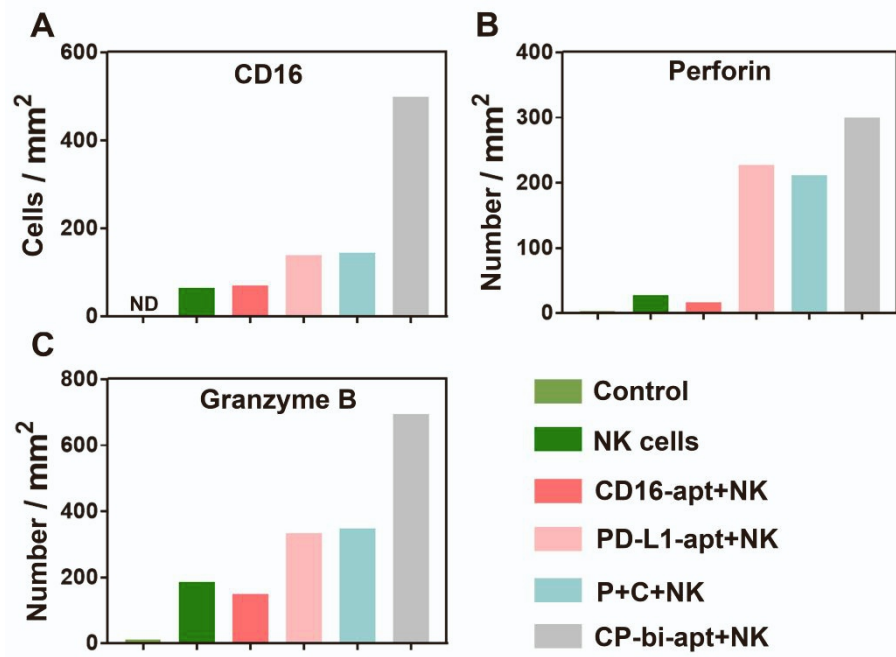

**Figure S14.** The statistical results of (A) CD16, (B) perforin and (C) Granzyme B immunofluorescence staining shown in Figure 6.



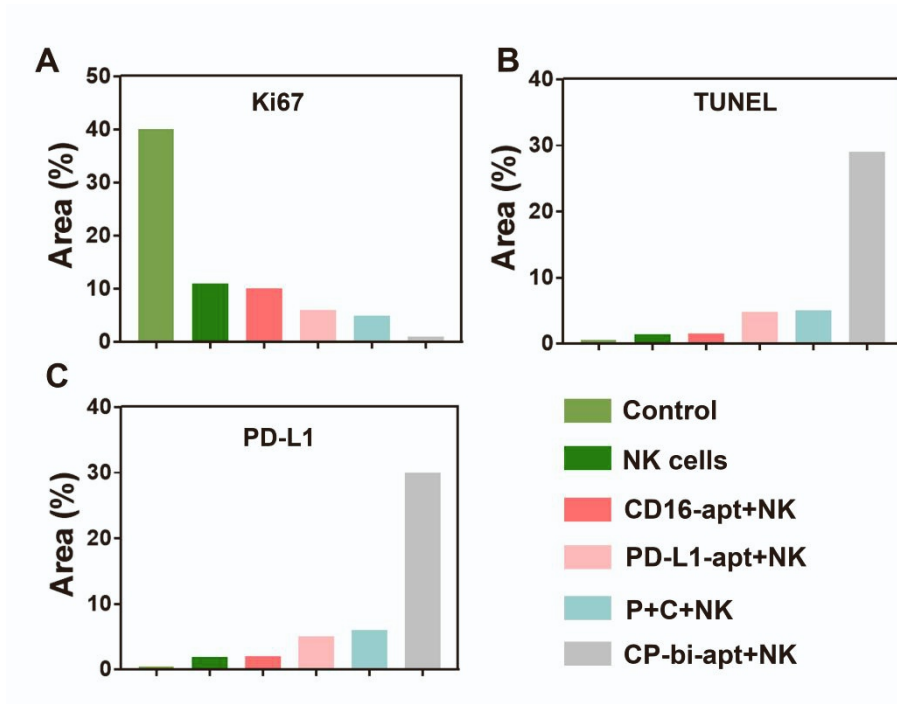

**Figure S15.** The statistical results of (A) Ki67, (B) TUNEL and (C) PD-L1 staining shown in Figure 7.

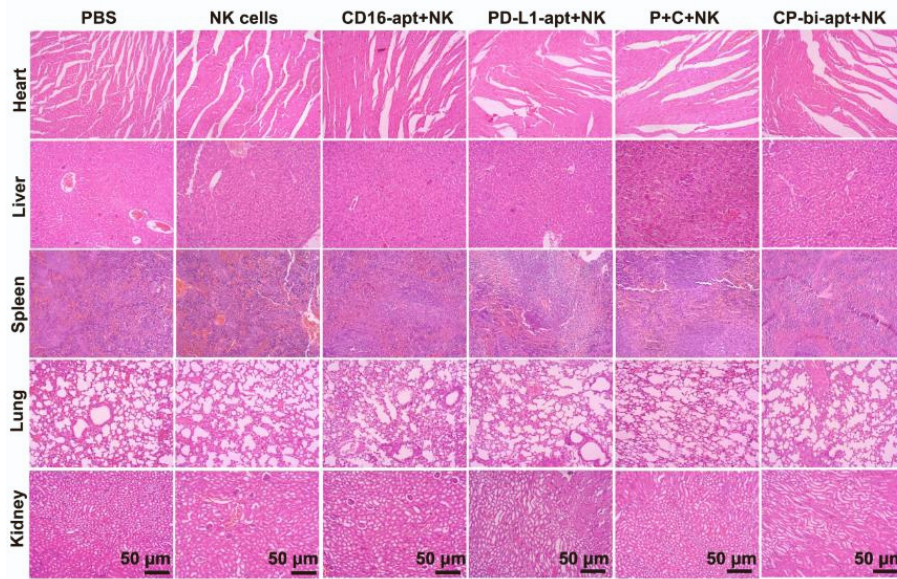

**Figure S16.** Histological images of the major organs (heart, liver, spleen, lung, and kidney) of mice with indicated treatments after the staining with H&E. Scale bar: 50  $\mu\text{m}$ .

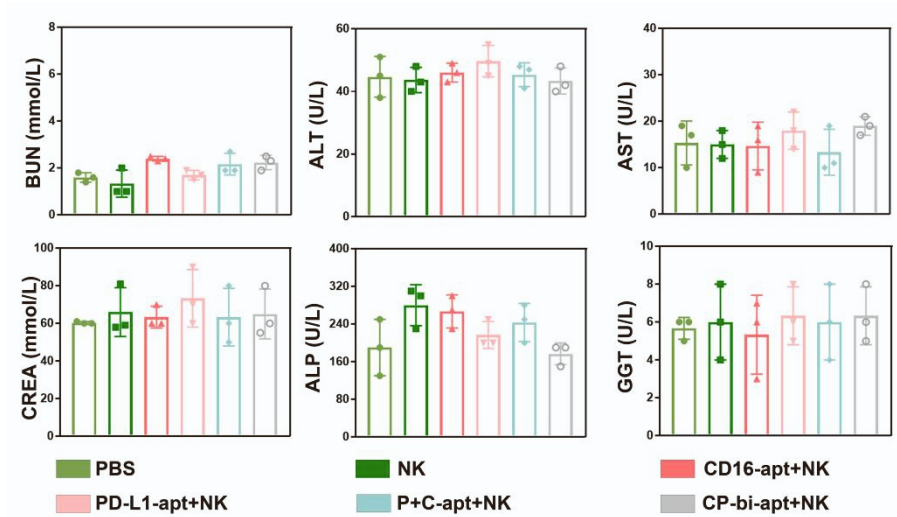

**Figure S17.** The analysis of serum biochemical indexes of the SMMC-7721 tumor-bearing mice with indicated treatments at three days after last injection. n = 3.
